# Supplementary material for: Development and Comparison of a Panel of Modified CS17 Fimbrial Tip Adhesin Proteins as Components for an Adhesin-Based Vaccine against Enterotoxigenic Escherichia coli
Source: MDPI journal article supplement (doi:10.3390/microorganisms9081646), 2021-07-31

Figure S1. Circular dichroism spectra of dscCsbD<sub>WS6788</sub> (resolubilized) and dscCsbD<sub>WS6788</sub> (soluble).

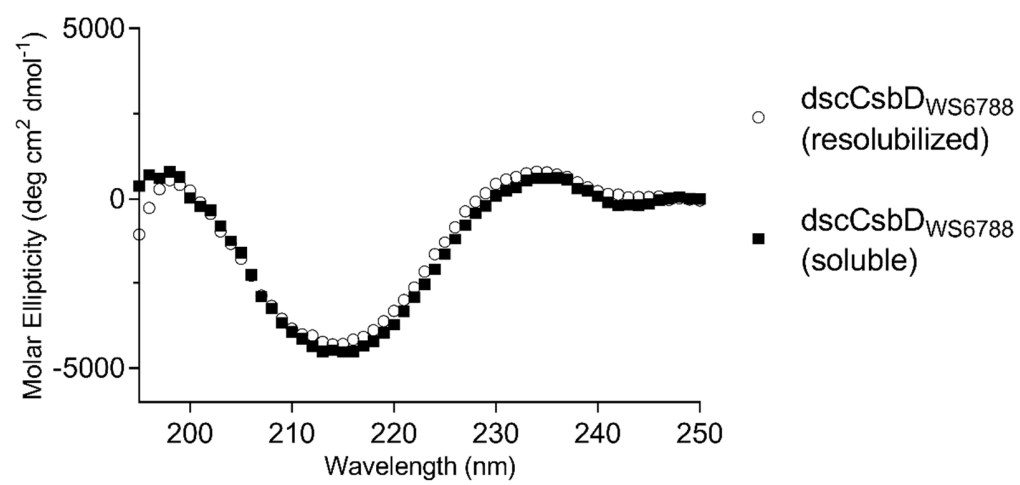

Supplement: s1 [file s1]
